# Supplementary material for: Virtual screening of phytochemical compounds as potential inhibitors against SARS-CoV-2 infection
Source: PubMed Central journal article supplement (PMC7841026; doi:10.1186/s43088-021-00095-x), 2021-01-28
Supplement: 43088_2021_95_MOESM1_ESM.pdf [file 43088_2021_95_MOESM1_ESM.pdf]

## Supplementary Data

### Additional file 1 — Binding Affinity values for PRODIGY and Hydrophobicity Values from GRAVY

| Regions  | Hydrophobicity index (GRAVY) | Hydrophobic interactions (in numbers) | Binding affinity(kcal/mol) PRODIGY |
|----------|------------------------------|---------------------------------------|------------------------------------|
| Region 4 | -0.08                        | 10                                    | -14                                |
| Region 1 | -0.24                        | 7                                     | -12.4                              |
| Region 3 | -0.28                        | 4                                     | -10.1                              |
| Region 2 | -0.3                         | 3                                     | -9.8                               |

### Additional file 2 — Filters Applied to Screen Lead Compounds and their respective output

| Ligand         | Lipinski | Ghose | Veber | Egan | Muegge | Bioavailability score |
|----------------|----------|-------|-------|------|--------|-----------------------|
| Tanshinone I   | Yes      | Yes   | Yes   | Yes  | Yes    | 0.55                  |
| Ellipticine    | Yes      | Yes   | Yes   | Yes  | Yes    | 0.55                  |
| Anabsinthin    | Yes(0)   | No(3) | Yes   | Yes  | No(1)  | 0.55                  |
| Camptothecin   | Yes(0)   | Yes   | Yes   | Yes  | Yes    | 0.55                  |
| Piperolactam A | Yes(0)   | Yes   | Yes   | Yes  | Yes    | 0.55                  |

### Additional file 3 — Scores from SWISS ADME Server

| Compounds      | Swiss ADME cLogP | Mean Calculated cLogP | Lipophilicity (Consensus Log Po/w) | Log S (ESOL) |
|----------------|------------------|-----------------------|------------------------------------|--------------|
| Tanshinone I   | 3.4              | 3.615                 | 3.4                                | -4.41        |
| Ellipticine    | 3.92             | 4.1                   | 3.92                               | -5.05        |
| Anabsinthin    | 3.64             | 3.455                 | 3.58                               | -4.59        |
| Camptothecin   | 2.2              | 2.115                 | 2.2                                | -3.49        |
| Piperolactam A | 2.85             | 3.125                 | 2.85                               | -3.87        |

### Additional file 4 — Lead Likelihood Values for the Screened Compounds

| Ligand         | PAINS | Brenk | Leadlikeness | Synthetic Accessibility |
|----------------|-------|-------|--------------|-------------------------|
| Tanshinone I   | 2     | 1     | No(1)        | 3.28                    |
| Ellipticine    | 0     | 0     | No(2)        | 1.6                     |
| Anabsinthin    | 0     | 2     | No(1)        | 7.08                    |
| Camptothecin   | 0     | 0     | Yes          | 3.84                    |
| Piperolactam A | 0     | 1     | Yes          | 2.02                    |

### Additional file 5 — Toxicity Analysis of the Screened Compounds

| Ligand         | hERG inhibition | AMES mutagenicity | Carcinogenicity | Acute Oral Toxicity |
|----------------|-----------------|-------------------|-----------------|---------------------|
| Tanshinone I   | -               | +                 | -               | III                 |
| Ellipticine    | -               | +                 | -               | III                 |
| Anabsinthin    | -               | -                 | -               | I                   |
| Camptothecin   | -               | -                 | -               | II                  |
| Piperolactam A | -               | +                 | -               | III                 |
